# Supplementary material for: Synthesis of unusual coral-like layered double hydroxide microspheres in a nonaqueous polar solvent/surfactant system
Source: Royal Society of Chemistry journal article supplement (doi:10.1039/b719817e), 2008-01-01
Supplement: b719817e.pdf [file b719817e.pdf]

## Synthesis of Unusual Coral-like Layered Double Hydroxide Microspheres in Nonaqueous Polar Solvents

Poernomo Gunawan, and Rong Xu\*

*School of Chemical & Biomedical Engineering, Nanyang Technological  
University, 62 Nanyang Drive, Singapore 637459*

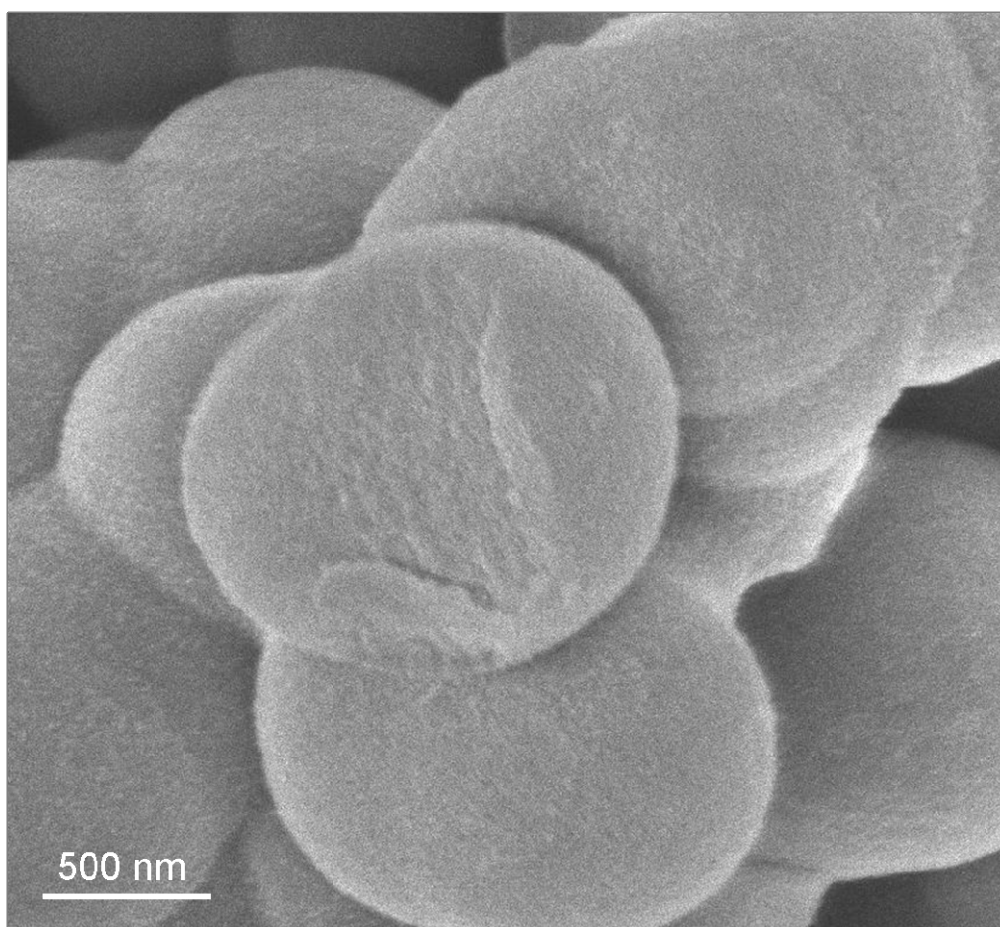

**Figure S1.** High magnification SEM image of DS-intercalated Mg-Al LDH (sample B-100C) prepared in a mixture of ethylene glycol and methanol (1:1 volumetric ratio) at 100 °C for 18 h.

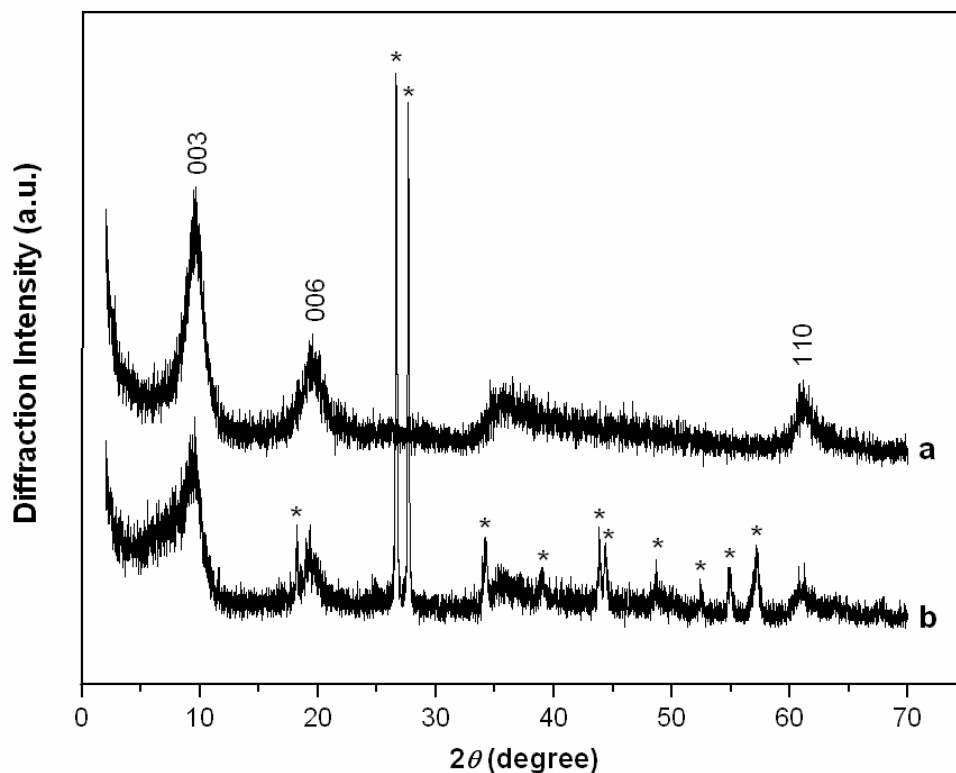

**Figure S2.** XRD patterns of samples (a) C-48h; and (b) B-180C, \* indicates  $\text{Mg}_{1.33}(\text{SO}_4)(\text{OH})_{0.66}\cdot 0.33\text{H}_2\text{O}$  phase (JCPDS 037-0097).

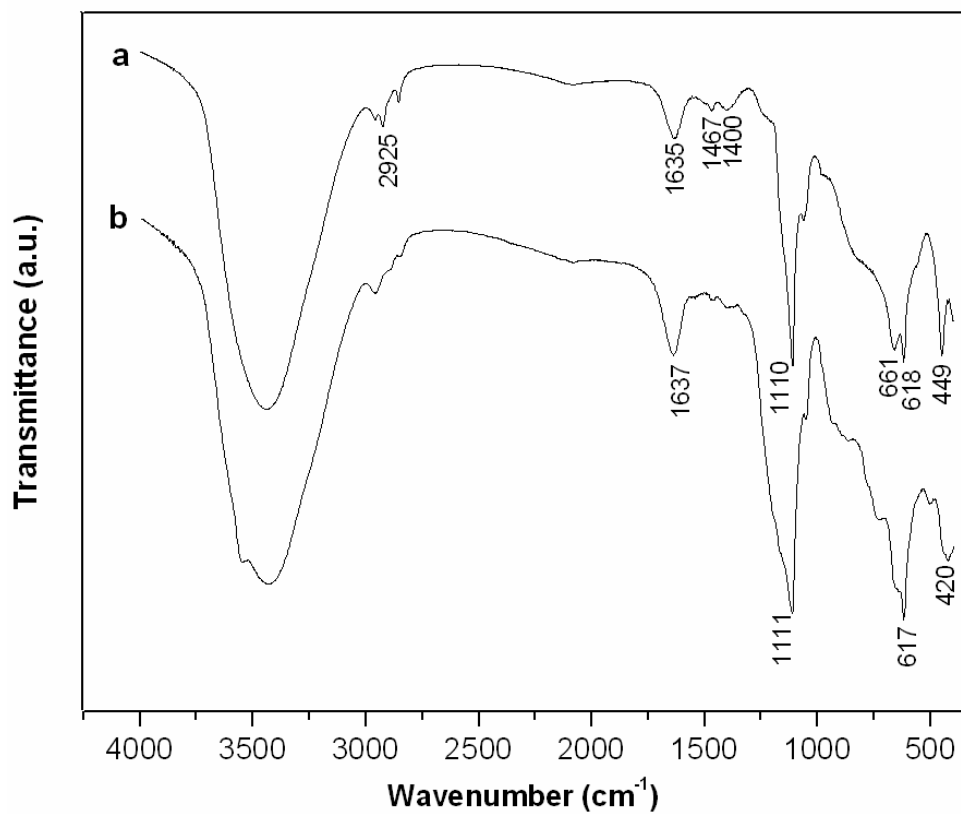

**Figure S3.** FTIR spectra of samples (a) C-48h; and (b) B-180C.
